# Supplementary material for: Synthesis of the tetrasaccharide repeating unit of the O-antigen of the Escherichia coli O69 strain and its conformational analysis
Source: Royal Society of Chemistry journal article supplement (doi:10.1039/c4ra06989g), 2014-01-01
Supplement: c4ra06989g1.pdf [file c4ra06989g1.pdf]

## SUPPORTING INFORMATION

### **Synthesis of the tetrasaccharide repeating unit of the *O*-antigen of *Escherichia coli* O69 strain and its conformational analysis**

Manas Jana,<sup>a</sup> Rajiv Kumar Kar,<sup>b</sup> Anirban Bhunia<sup>b</sup> and Anup Kumar Misra<sup>a\*</sup>

<sup>a</sup>Bose Institute, Division of Molecular Medicine, P-1/12, C.I.T. Scheme VII-M, Kolkata-700054, India; FAX: 91-33-2355 3886; E-mail: [akmisra69@gmail.com](mailto:akmisra69@gmail.com)

<sup>b</sup>Bose Institute, Department of Biophysics, P-1/12, C.I.T. Scheme VII-M, Kolkata-700054, India

\* Corresponding author

#### **Index**

| <b>Subject</b>                                                                            | <b>Page No.</b> |
|-------------------------------------------------------------------------------------------|-----------------|
| 1D and 2D NMR spectra of compounds <b>1</b> and <b>3, 6, 7, 9</b>                         | <b>2-12</b>     |
| Inter-proton distances of each inter-glycosidic linkage                                   | <b>13</b>       |
| Root-mean-squared-deviation (RMSD) plot with respect to the individual carbohydrate rings | <b>14</b>       |
| Coulombic and van der Waals (vdW) contribution                                            | <b>15</b>       |

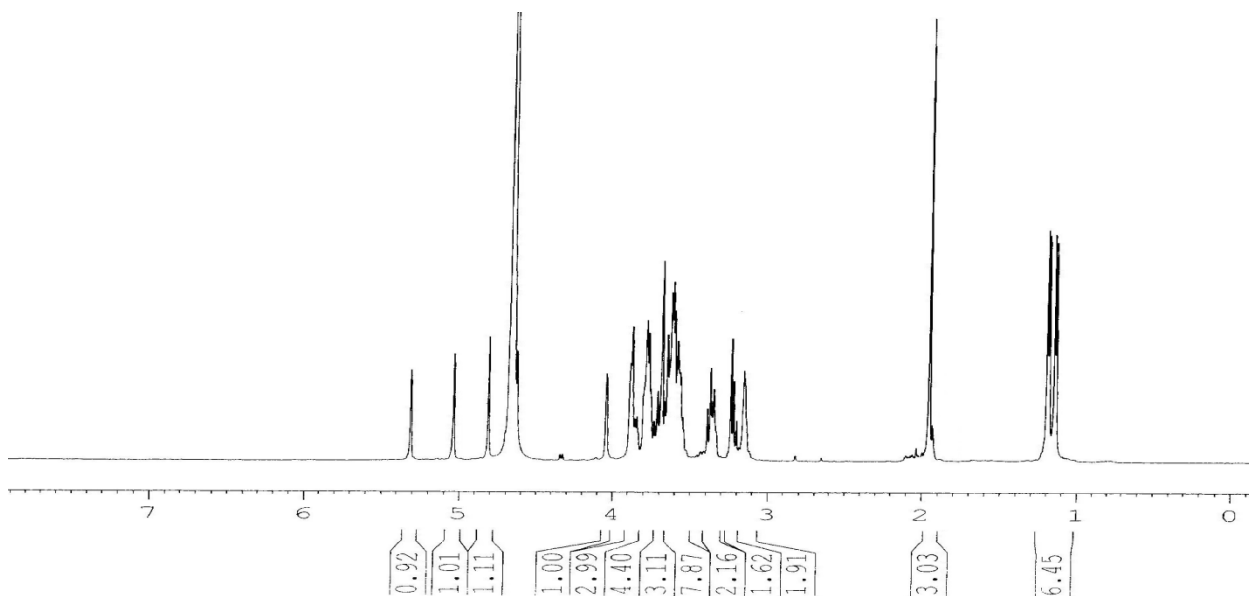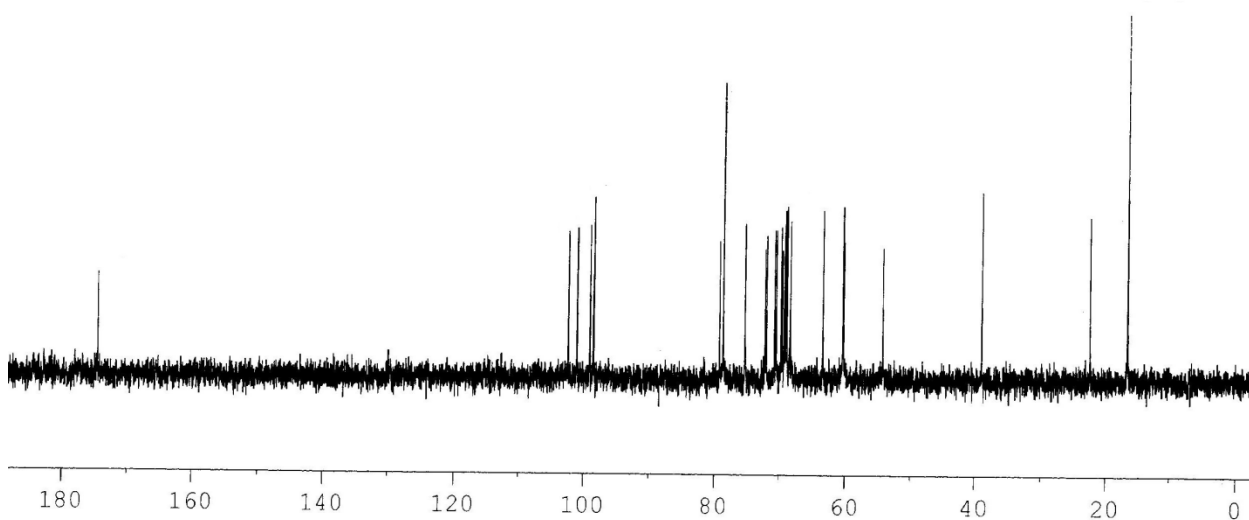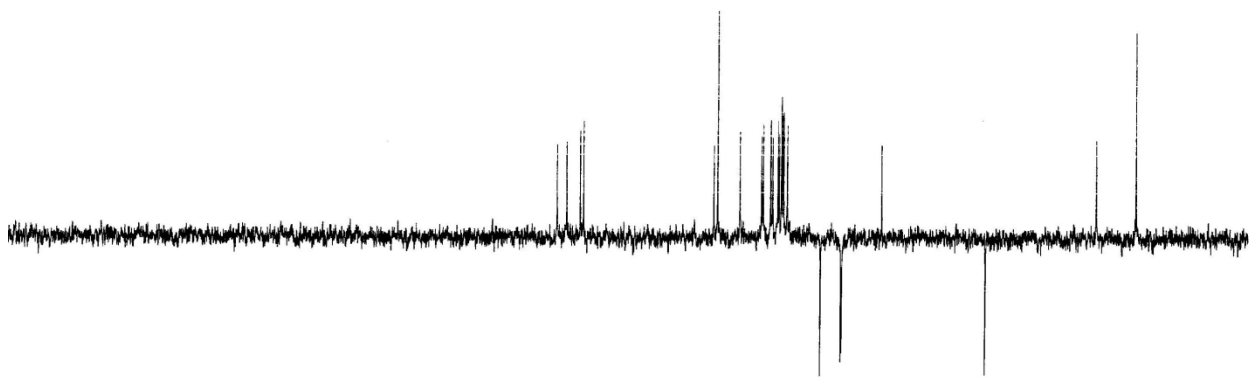

180 170 160 150 140 130 120 110 100 90 80 70 60 50 40 30 20 10 ppm

<sup>1</sup>H, <sup>13</sup>C and DEPT 135 NMR spectra of 2-aminoethyl ( $\alpha$ -D-galactopyranosyl)-(1 $\rightarrow$ 3)-(2-acetamido-2-deoxy- $\beta$ -D-glucopyranosyl)-(1 $\rightarrow$ 2)-( $\alpha$ -L-rhamnopyranosyl)-(1 $\rightarrow$ 2)- $\alpha$ -L-rhamnopyranoside (**1**) (D<sub>2</sub>O).

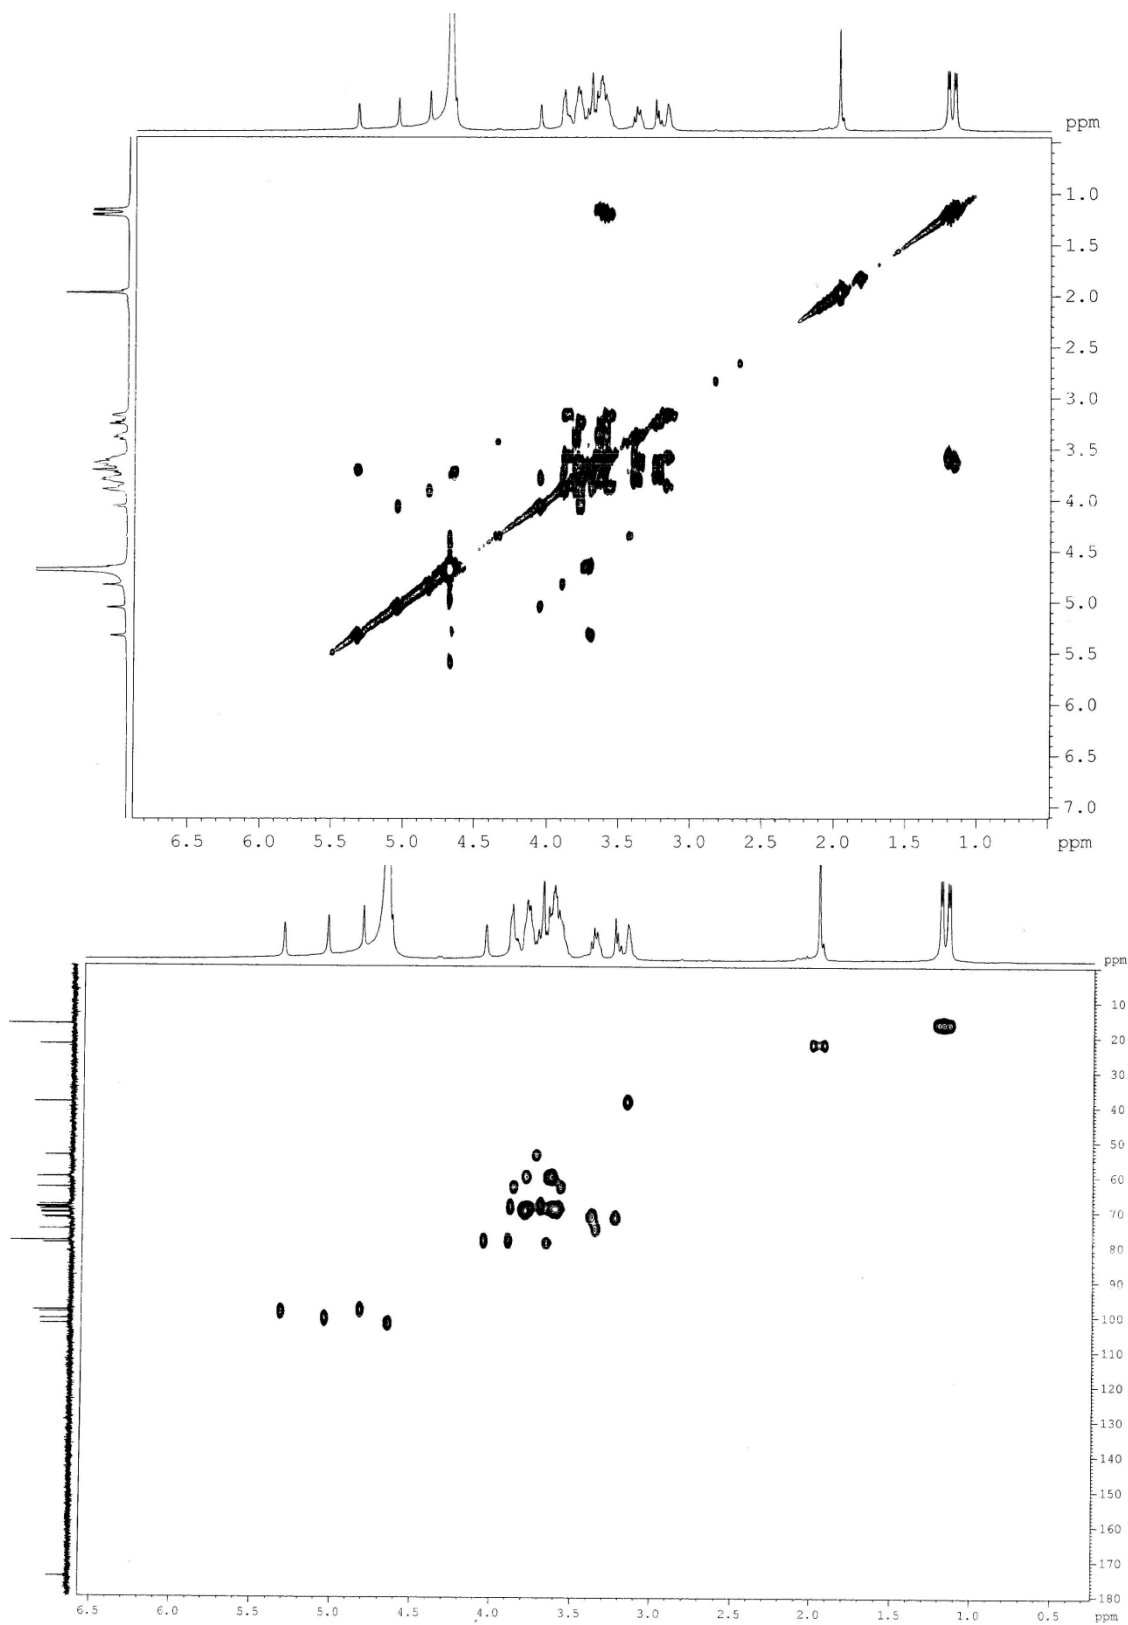

2D COSY and HSQC NMR spectra (selected regions) of 2-aminoethyl ( $\alpha$ -D-galactopyranosyl)-(1 $\rightarrow$ 3)-(2-acetamido-2-deoxy- $\beta$ -D-glucopyranosyl)-(1 $\rightarrow$ 2)-( $\alpha$ -L-rhamnopyranosyl)-(1 $\rightarrow$ 2)- $\alpha$ -L-rhamnopyranoside (**1**) (D<sub>2</sub>O).

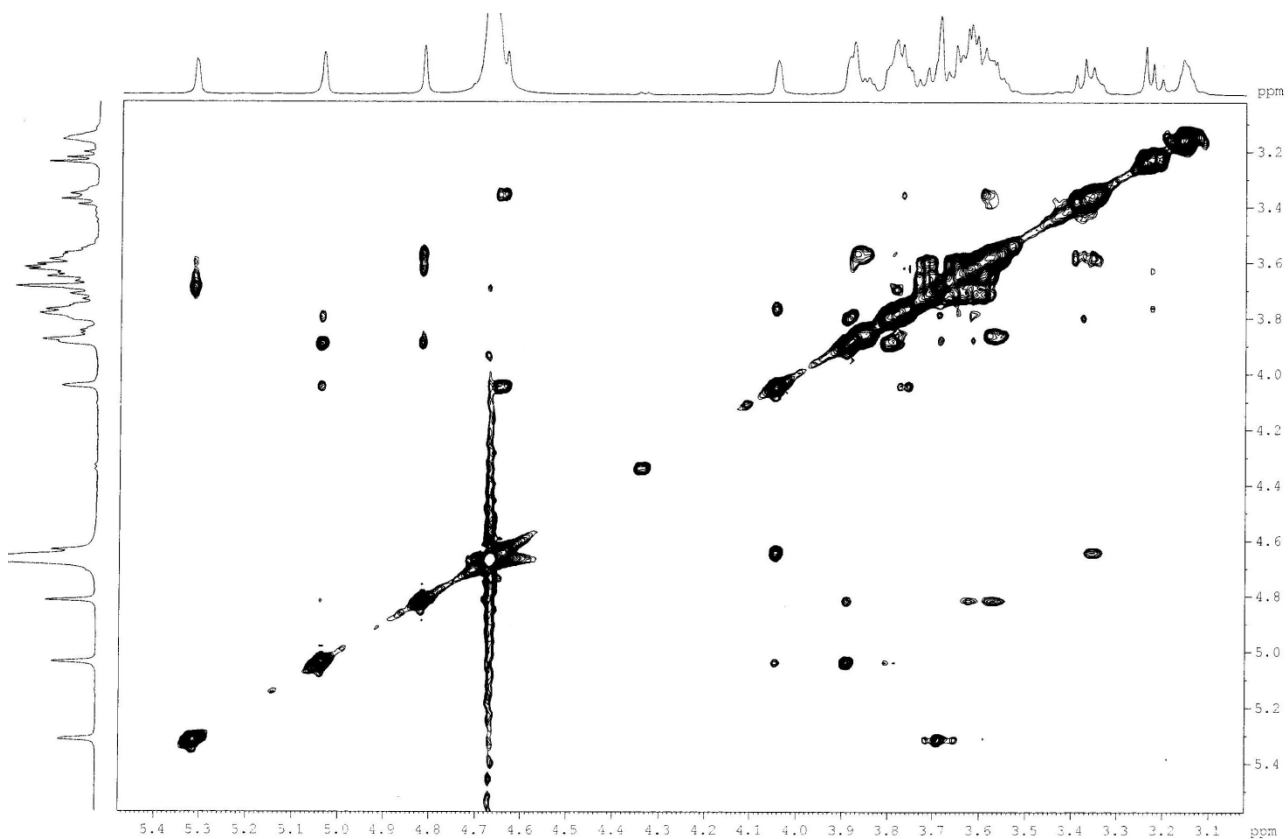

2D  $^1\text{H}$ - $^1\text{H}$  ROESY (300 ms spin lock) spectrum of 2-aminoethyl ( $\alpha$ -D-galactopyranosyl)-(1 $\rightarrow$ 3)-(2-acetamido-2-deoxy- $\beta$ -D-glucopyranosyl)-(1 $\rightarrow$ 2)-( $\alpha$ -L-rhamnopyranosyl)-(1 $\rightarrow$ 2)- $\alpha$ -L-rhamnopyranoside (**1**) showing the inter-glycosidic ROEs.

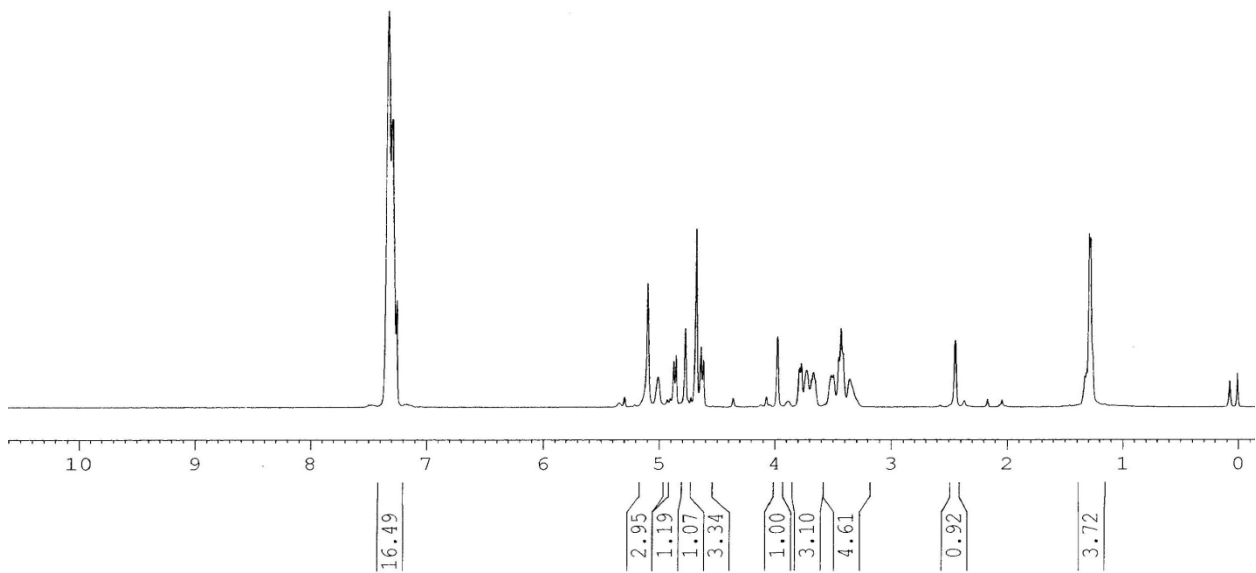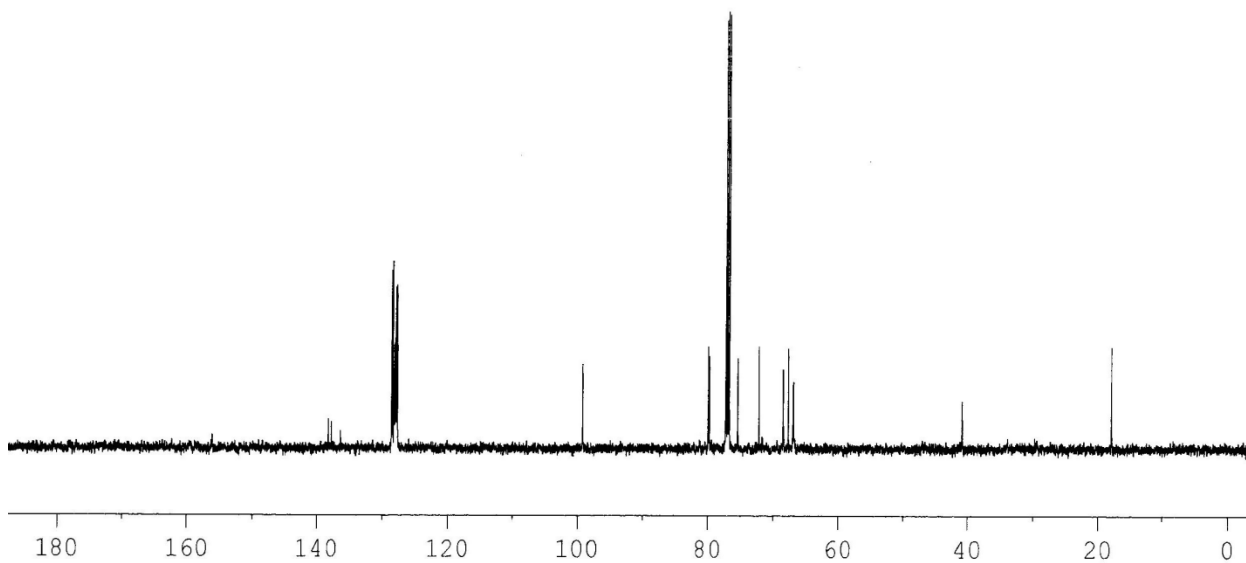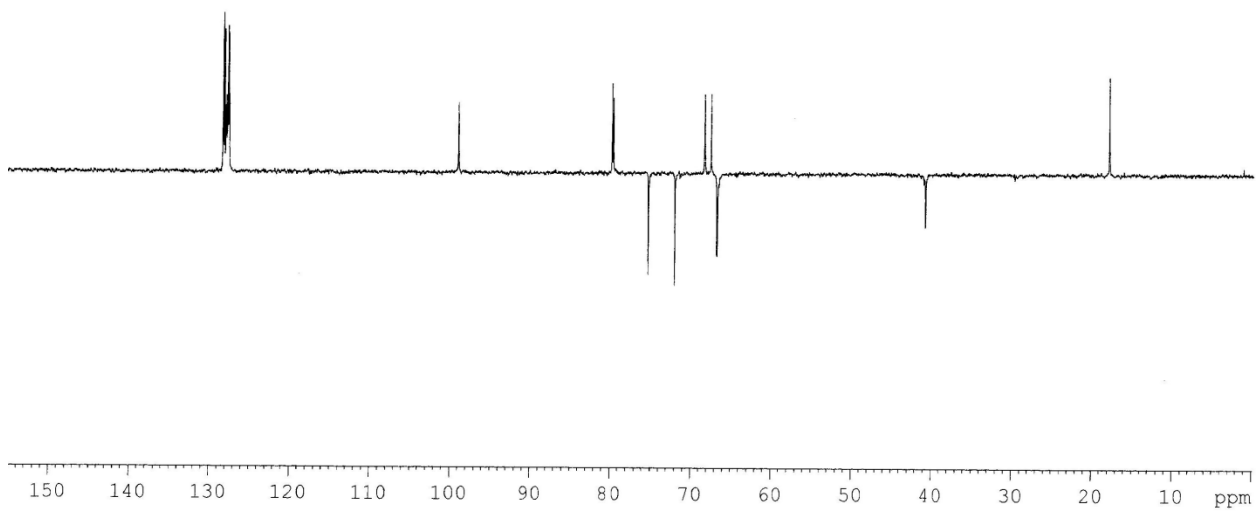

$^1\text{H}$ ,  $^{13}\text{C}$  and DEPT 135 NMR spectra of 2-(carbobenzyloxy)aminoethyl 3,4-di-*O*-benzyl- $\alpha$ -L-rhamnopyranoside (**3**) (CDCl<sub>3</sub>).

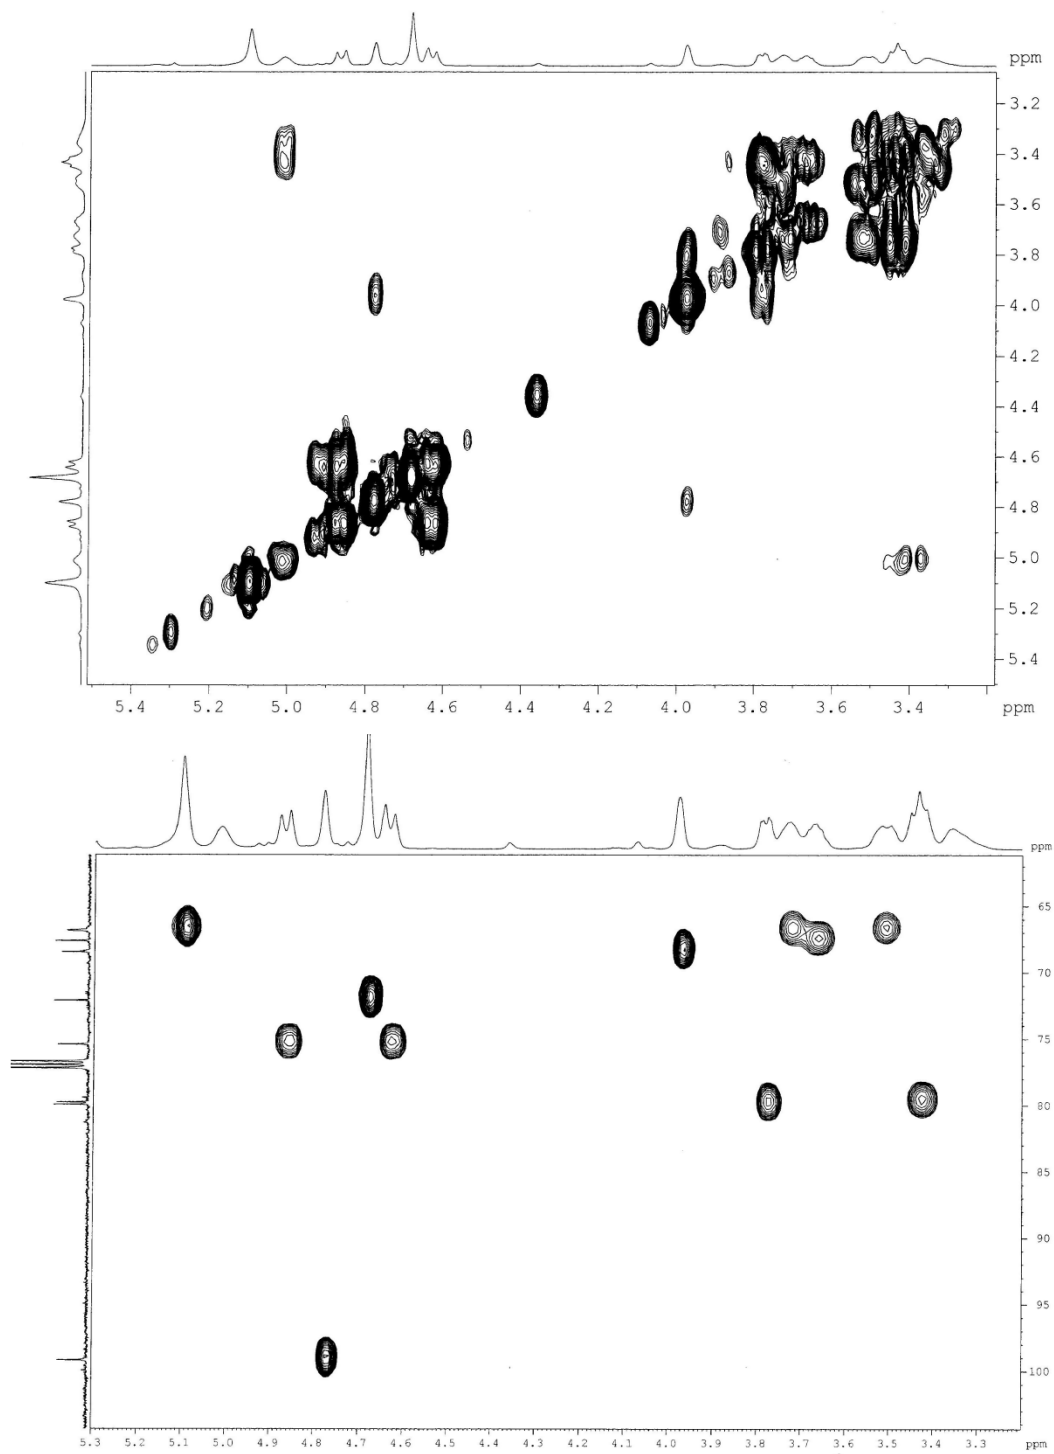

2D COSY and HSQC NMR spectra (selected regions) of 2-(carbobenzyloxy)aminoethyl 3,4-di-*O*-benzyl- $\alpha$ -L-rhamnopyranoside (**3**) (CDCl<sub>3</sub>).

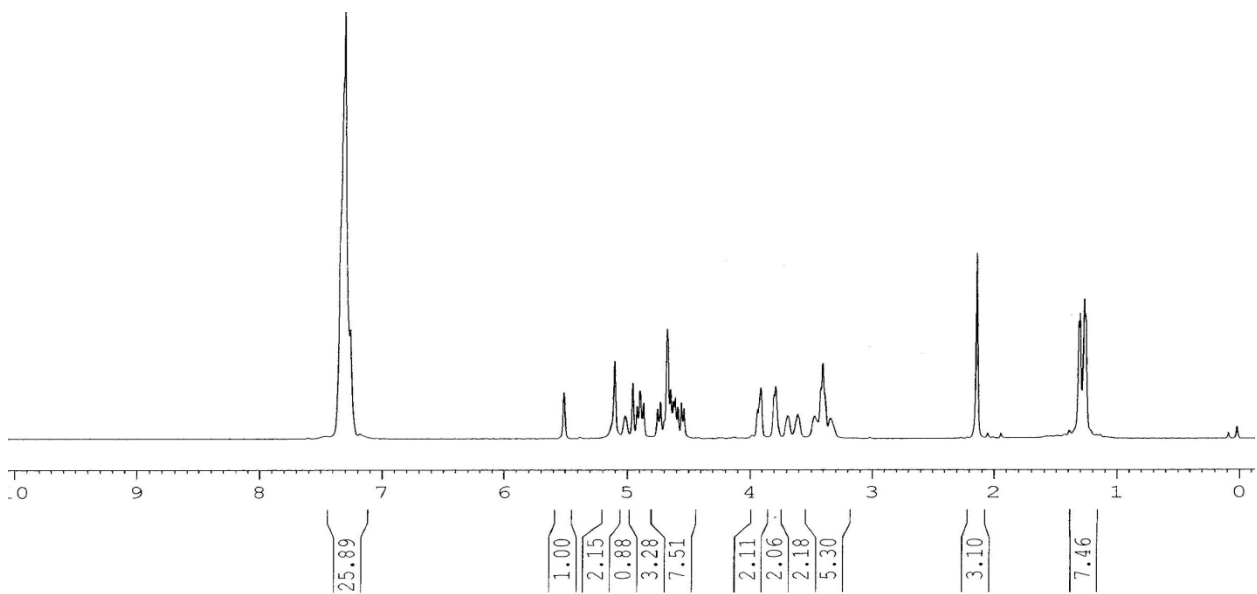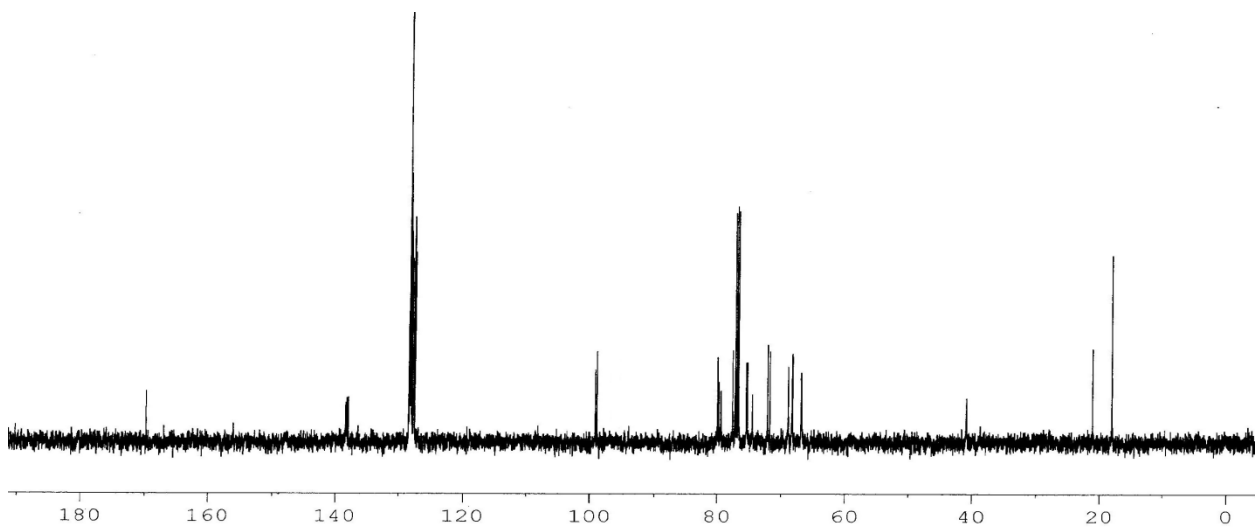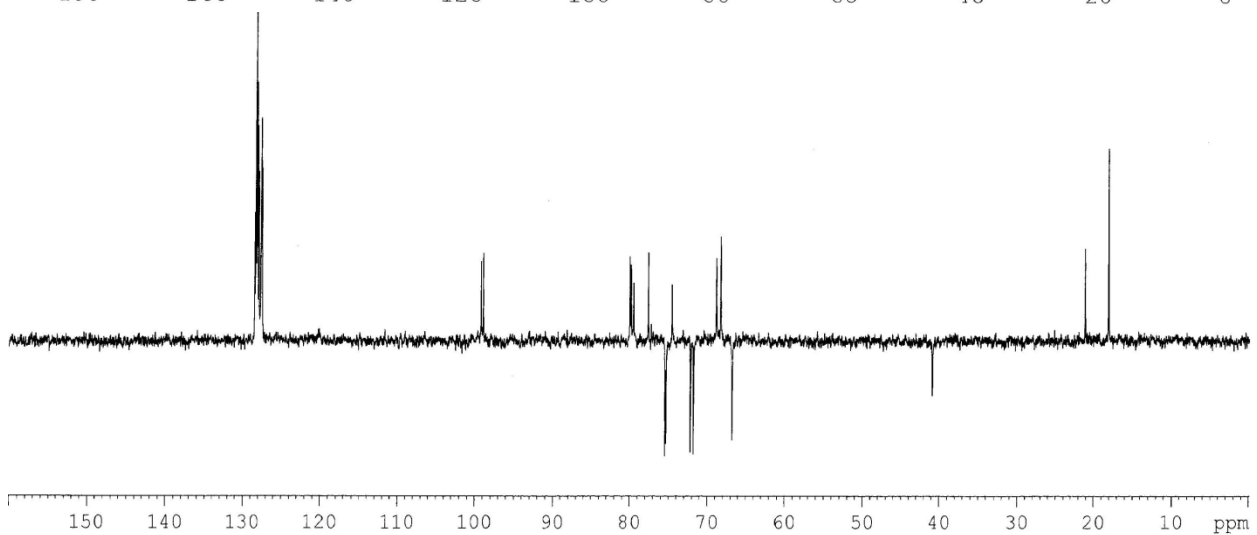

$^1\text{H}$ ,  $^{13}\text{C}$  and DEPT 135 NMR spectra of 2-(carbobenzyloxy)aminoethyl (2-*O*-acetyl-3,4-di-*O*-benzyl- $\alpha$ -L-rhamnopyranosyl)-(1 $\rightarrow$ 2)-3,4-di-*O*-benzyl- $\alpha$ -L-rhamnopyranoside (**6**) ( $\text{CDCl}_3$ ).

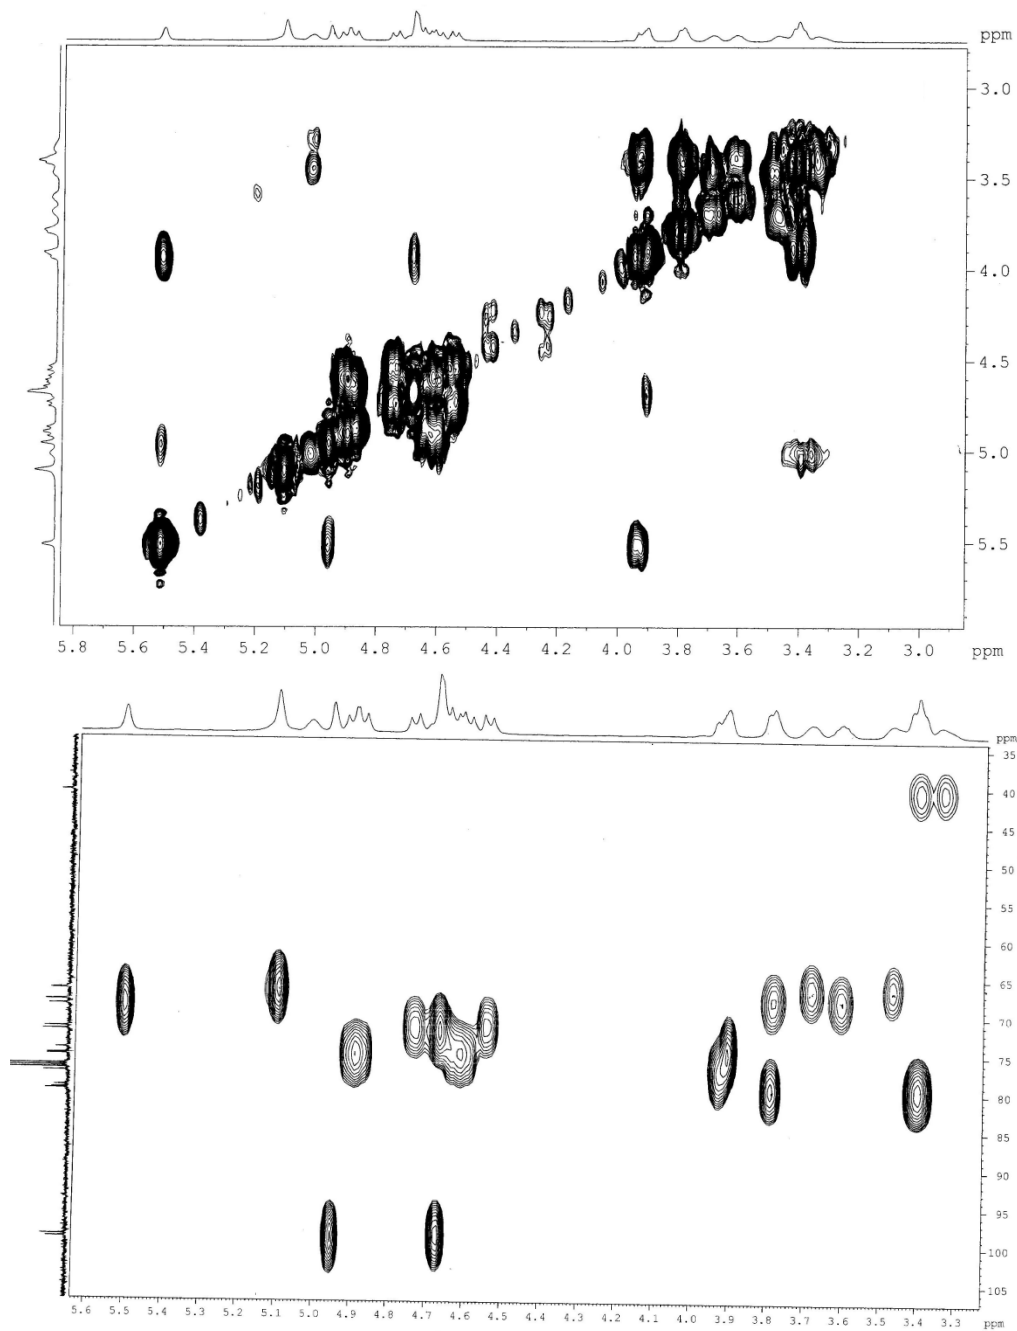

2D COSY and HSQC NMR spectra (selected regions) of 2-(carbobenzyloxy)aminoethyl (2-*O*-acetyl-3,4-di-*O*-benzyl- $\alpha$ -L-rhamnopyranosyl)-(1 $\rightarrow$ 2)-3,4-di-*O*-benzyl- $\alpha$ -L-rhamnopyranoside (**6**) (CDCl<sub>3</sub>).



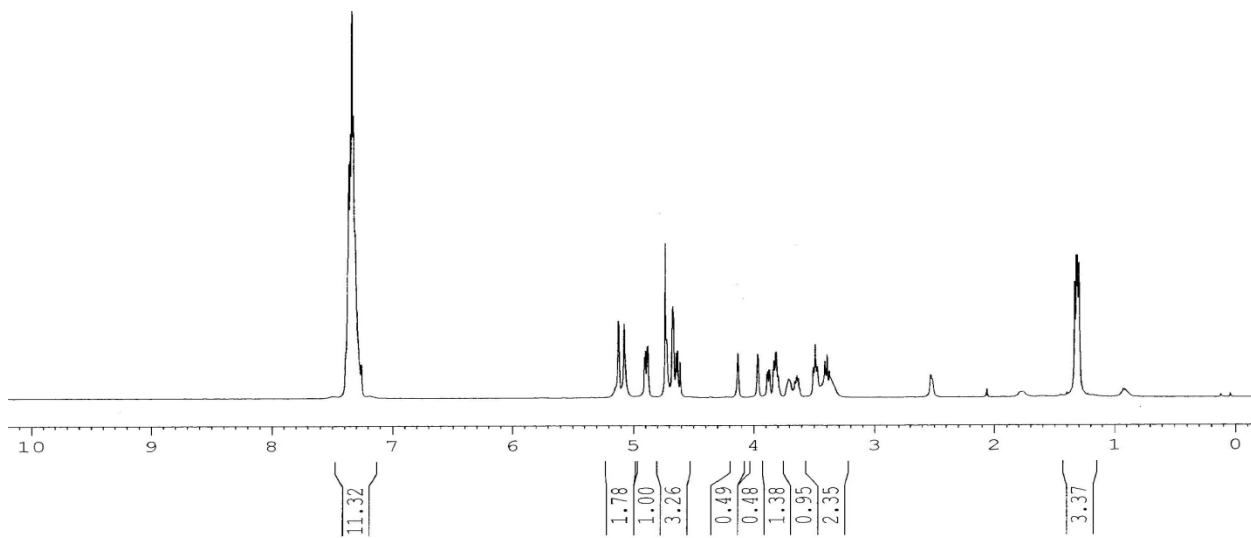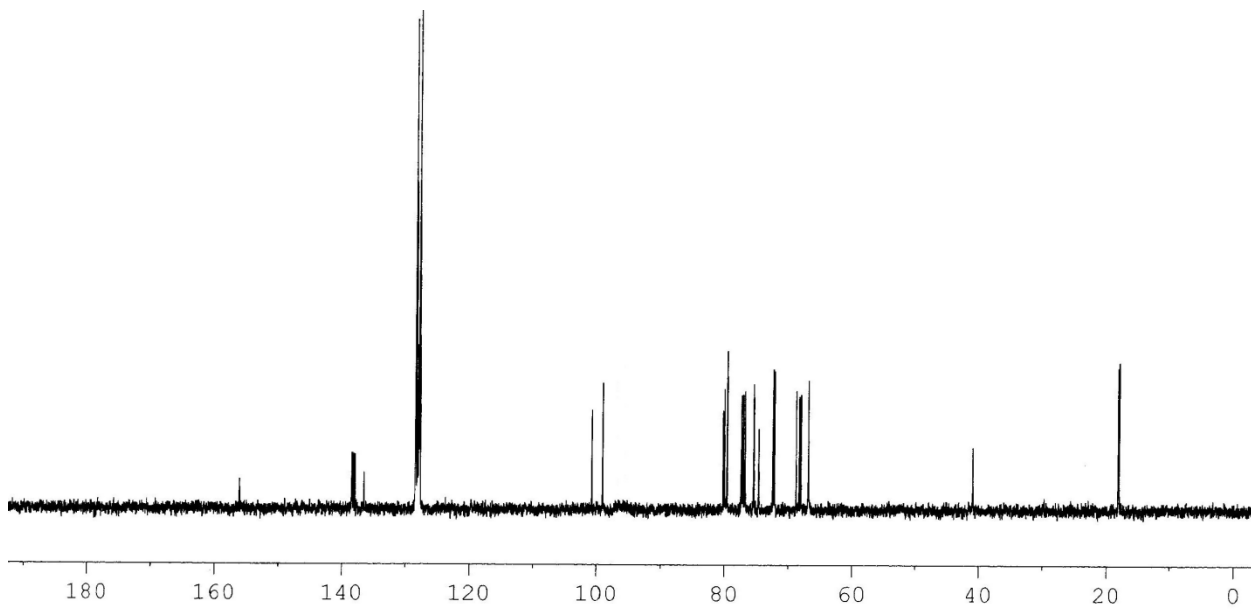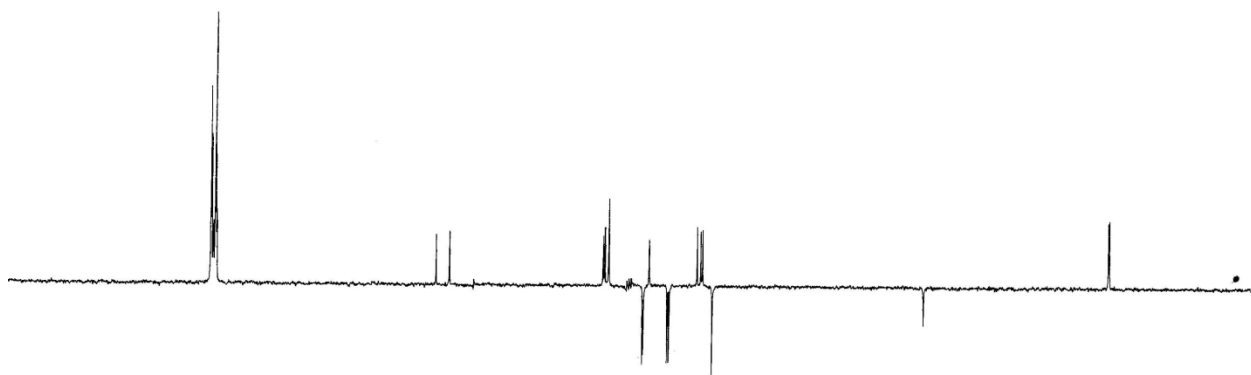

$^1\text{H}$ ,  $^{13}\text{C}$  and DEPT 135 NMR spectra of 2-(carbobenzyloxy)aminoethyl (3,4-di-*O*-benzyl- $\alpha$ -L-rhamnopyranosyl)-(1 $\rightarrow$ 2)-3,4-di-*O*-benzyl- $\alpha$ -L-rhamnopyranoside (**7**) ( $\text{CDCl}_3$ ).

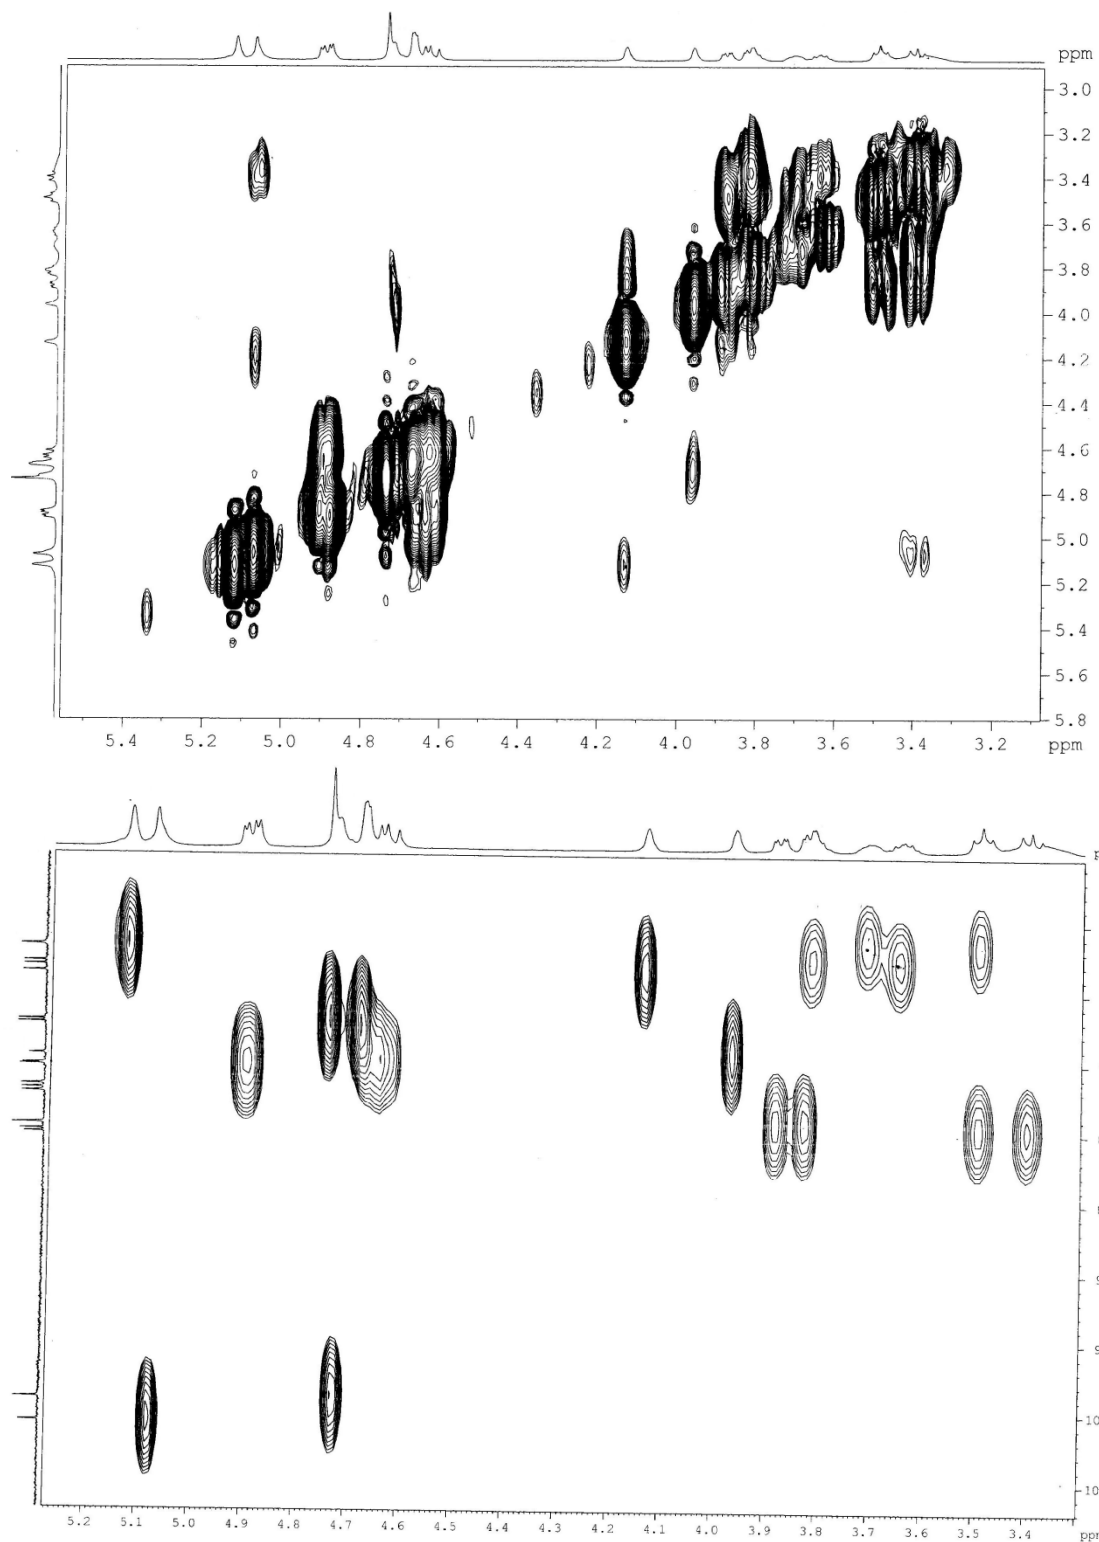

2D COSY and HSQC NMR spectra (selected regions) of 2-(carbobenzyloxy)aminoethyl (3,4-di-*O*-benzyl- $\alpha$ -L-rhamnopyranosyl)-(1 $\rightarrow$ 2)-3,4-di-*O*-benzyl- $\alpha$ -L-rhamnopyranoside (**7**) (CDCl<sub>3</sub>).

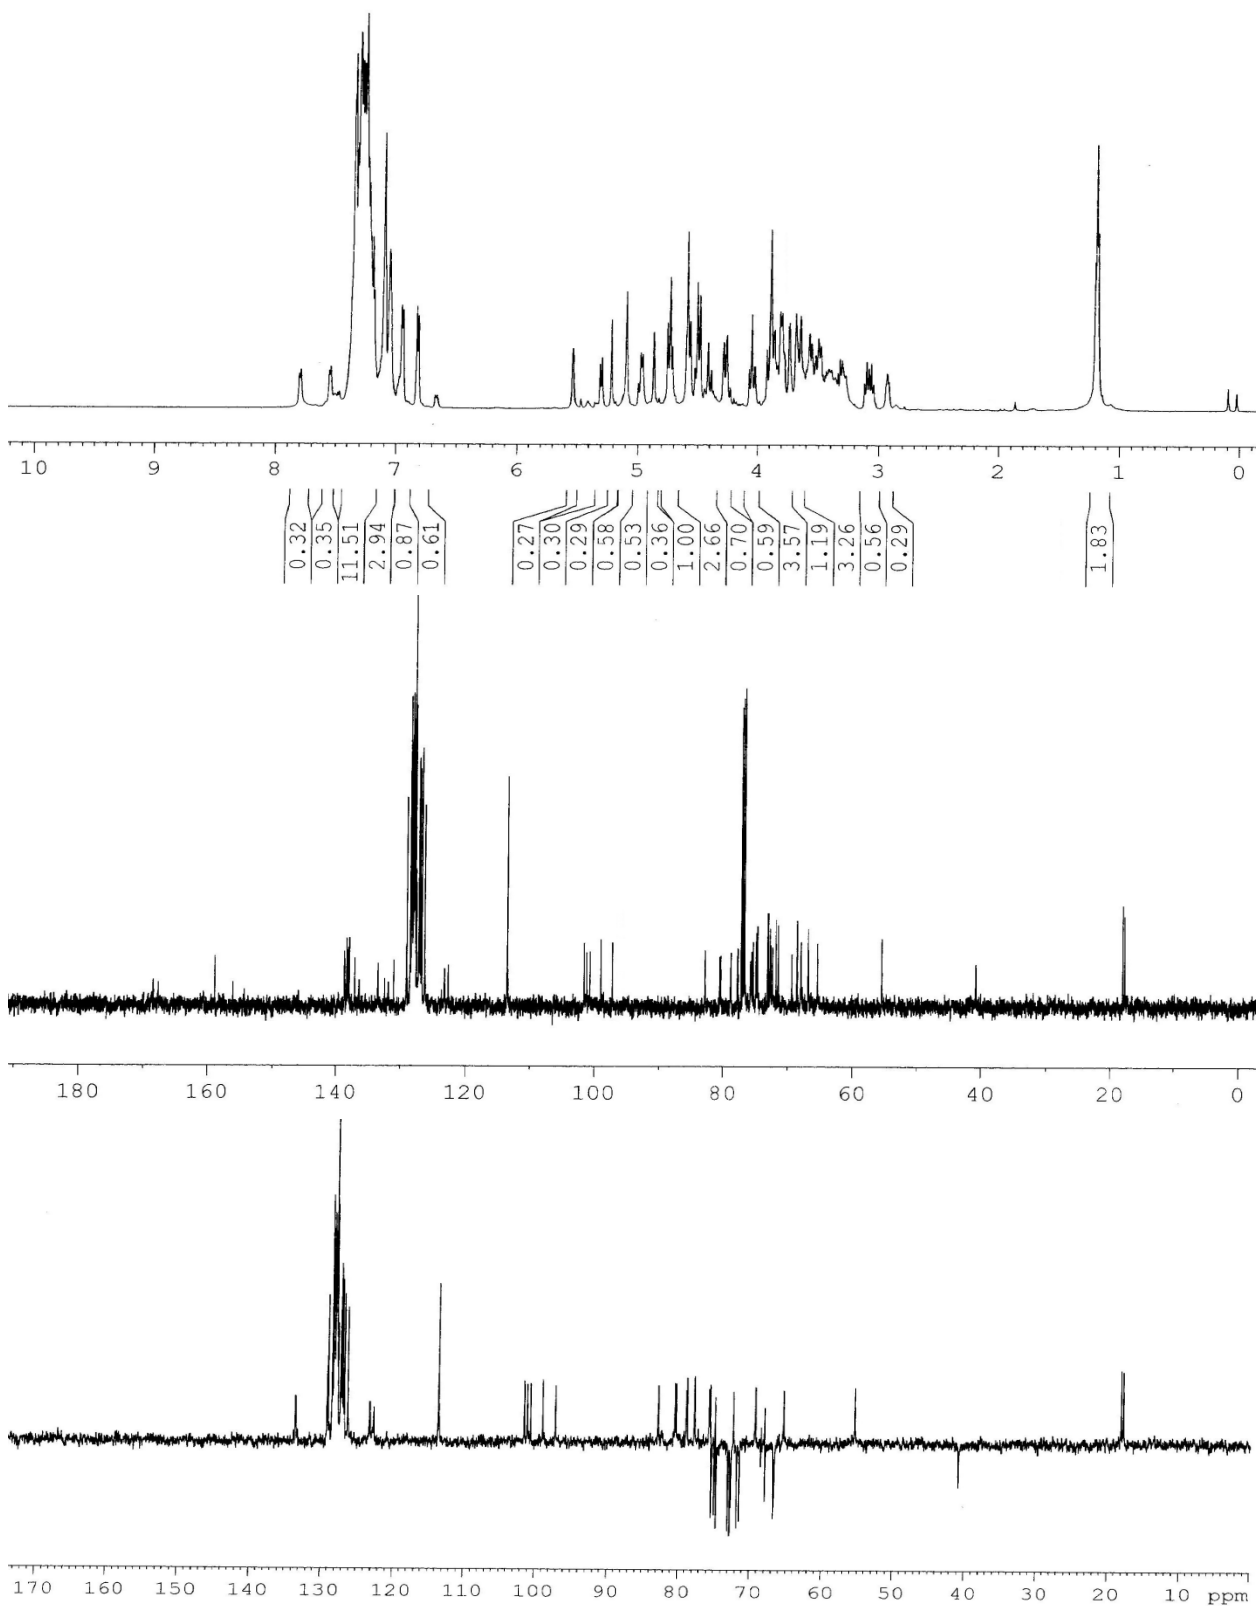

$^1\text{H}$ ,  $^{13}\text{C}$  and DEPT 135 NMR spectra of 2-(carbobenzyloxy)aminoethyl (2,3,4,6-tetra-*O*-benzyl- $\alpha$ -D-galactopyranosyl)-(1 $\rightarrow$ 3)-(4,6-*O*-benzylidene-2-deoxy-2-*N*-phthalimido- $\beta$ -D-glucopyranosyl)-(1 $\rightarrow$ 2)-(3,4-di-*O*-benzyl- $\alpha$ -L-rhamnopyranosyl)-(1 $\rightarrow$ 2)-3,4-di-*O*-benzyl- $\alpha$ -L-rhamnopyranoside (**9**) ( $\text{CDCl}_3$ ).

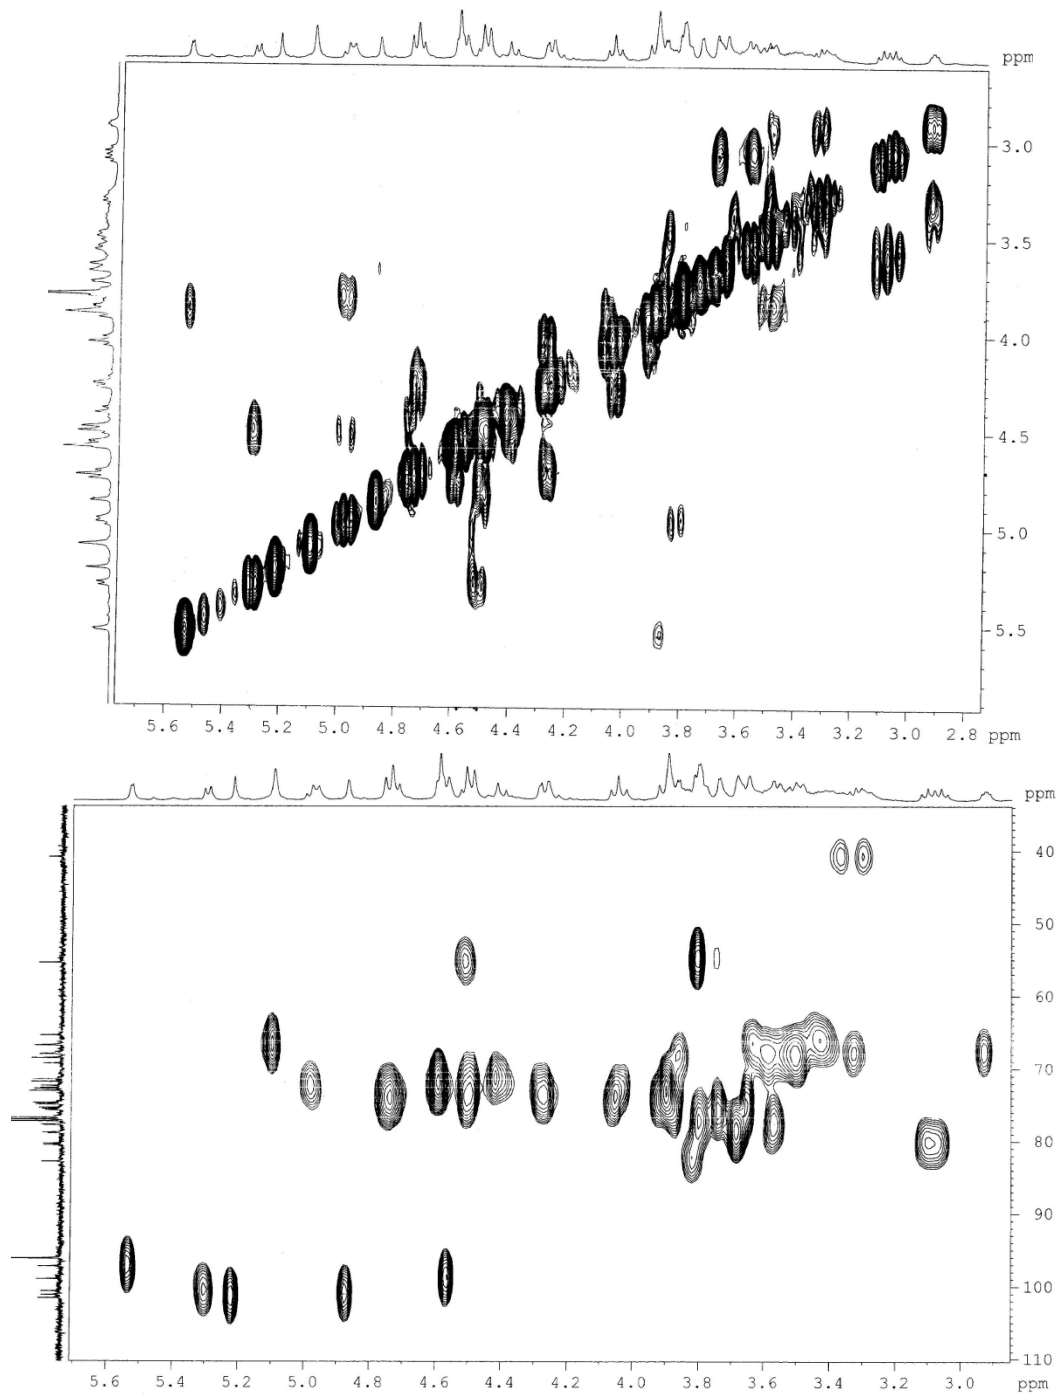

2D COSY and HSQC NMR spectra (selected regions) of 2-(carbobenzyloxy)aminoethyl (2,3,4,6-tetra-*O*-benzyl- $\alpha$ -D-galactopyranosyl)-(1 $\rightarrow$ 3)-(4,6-*O*-benzylidene-2-deoxy-2-*N*-phthalimido- $\beta$ -D-glucopyranosyl)-(1 $\rightarrow$ 2)-(3,4-di-*O*-benzyl- $\alpha$ -L-rhamnopyranosyl)-(1 $\rightarrow$ 2)-3,4-di-*O*-benzyl- $\alpha$ -L-rhamnopyranoside (**9**) (CDCl<sub>3</sub>).

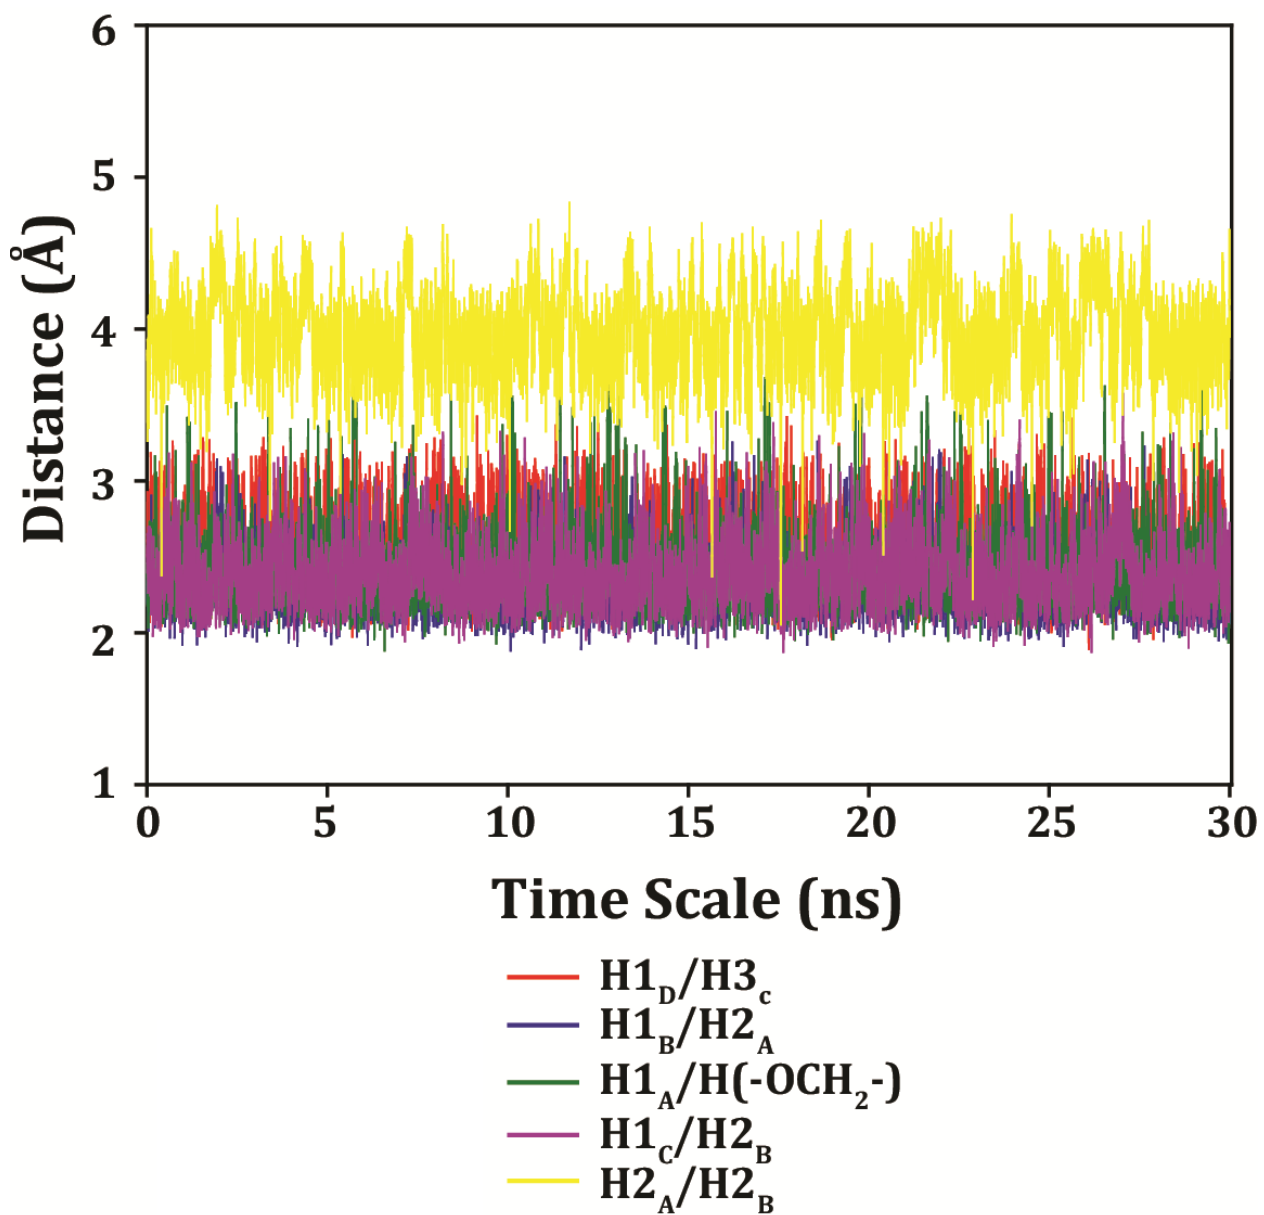

**Figure 1:** Inter-proton distances of each inter-glycosidic linkage.

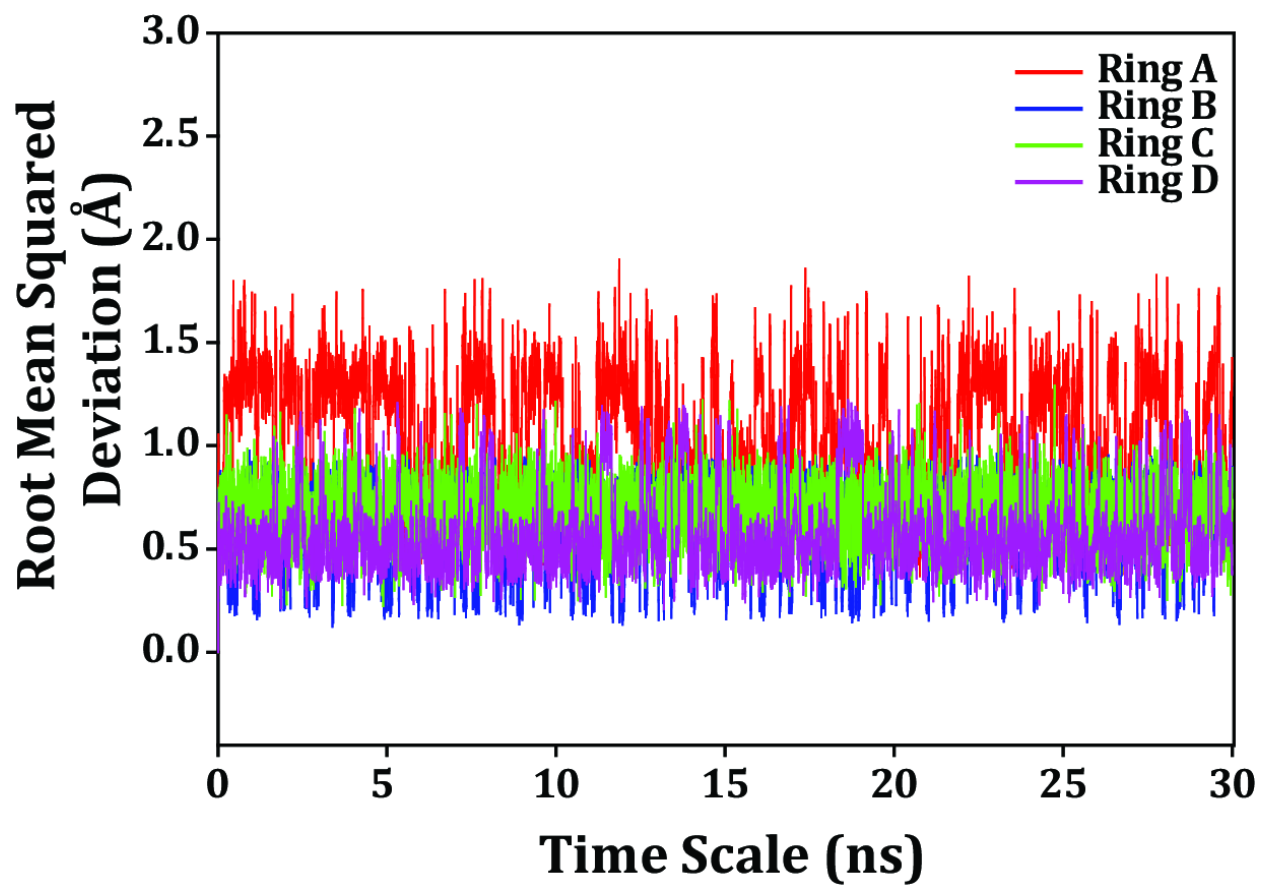

**Figure 2:** Root-mean-squared-deviation (RMSD) plot with respect to the individual carbohydrate rings.

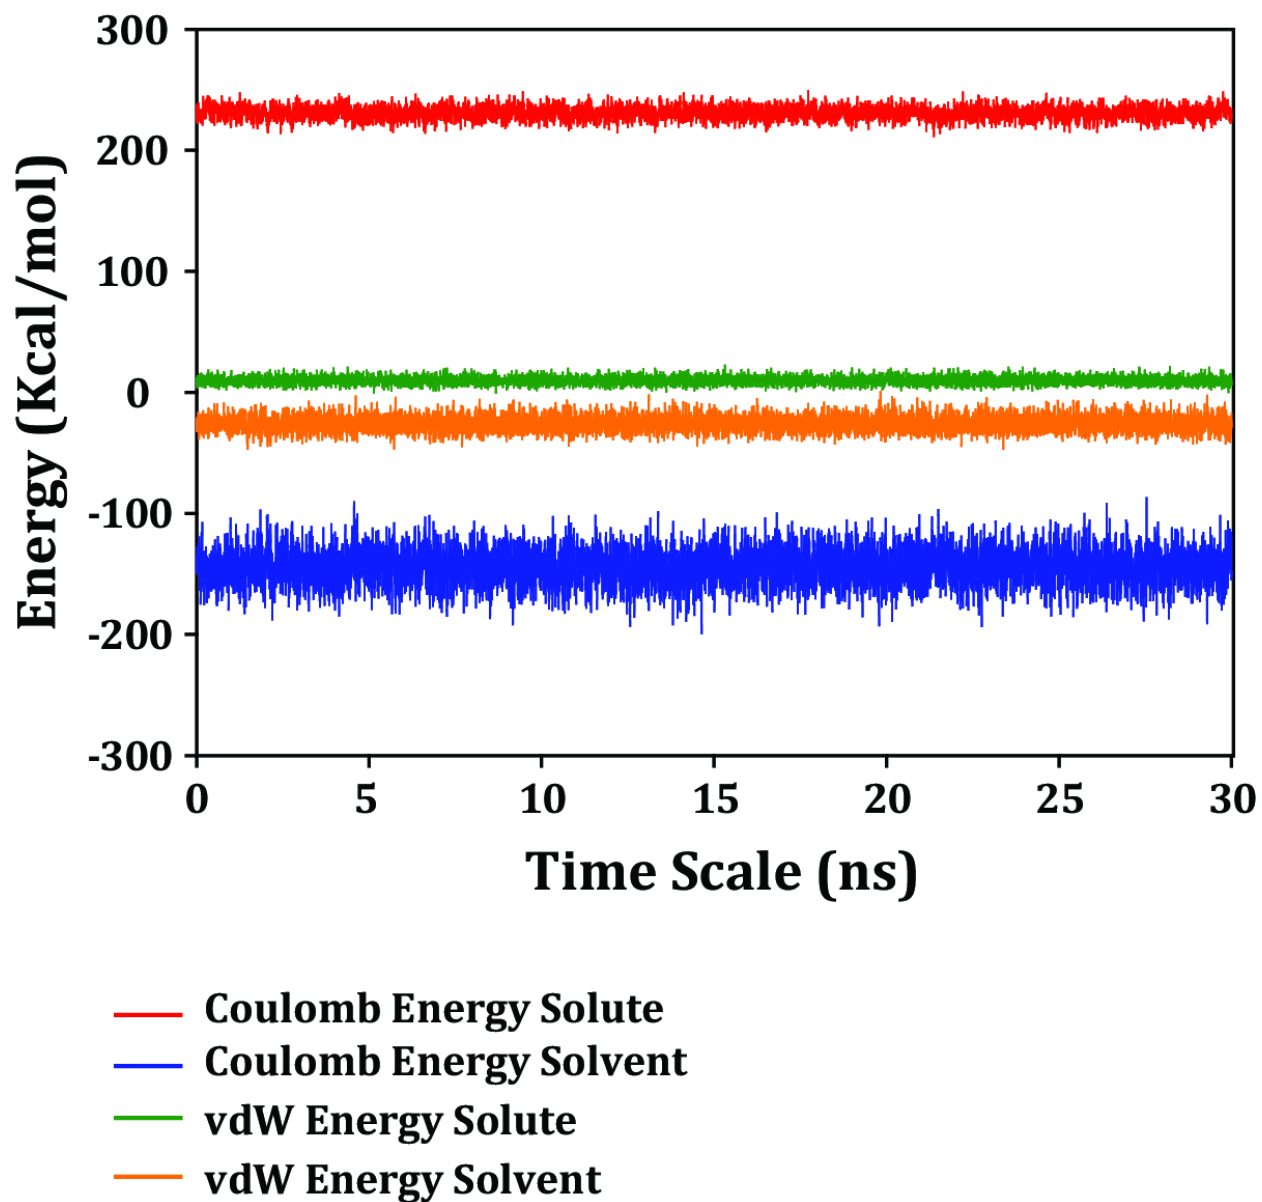

**Figure 3:** Coulombic and van der Waals (vdW) contribution.
